# Supplementary material
Source: PubMed Central journal article supplement (PMC3236504)
Supplement: NIHMS332174-supplement-1_si_001.pdf [file NIHMS332174-supplement-1_si_001.pdf]

## **Environmentally Persistent Free Radicals (EPFRs) – 2. Are Free Hydroxyl Radicals Generated in Aqueous Solutions?**

Lavrent Khachatryan and Barry Dellinger

Louisiana State University, Department of Chemistry, Baton Rouge, LA 70803

### ***Dependence of DMPO-OH adduct generation on biological reducing equivalents.***

The generation of hydroxyl radical in biological systems is usually enhanced by the presence of H-donors, e.g. NADPH and ascorbates etc.<sup>1,2</sup>. The effectiveness of NADPH and ascorbic acid on generation of DMPO-OH adducts in sample solutions is presented in **Figure S1**. Addition of 200  $\mu\text{M}$  NADPH resulted in a  $\sim 20\%$  increase in DMPO-OH adduct generation (**Figure S1A**), while addition of 100  $\mu\text{M}$  of ascorbic acid increased the DMPO-OH concentration  $\sim 100\%$  (**Figure S1B**). Above these concentrations, the DMPO-OH adduct concentration decreased, and, in the case of ascorbic acid, a characteristic doublet line of ascorbyl radicals appeared (cf. **Figure S2A**). The observed  $\alpha_{\text{H}} = 1.81 \text{ G}$  and  $g = 2.0057$  match very well with literature EPR data of ascorbyl radicals generated by oxidation of ascorbic acid by hydroxyl radicals<sup>3</sup>. DMPO-

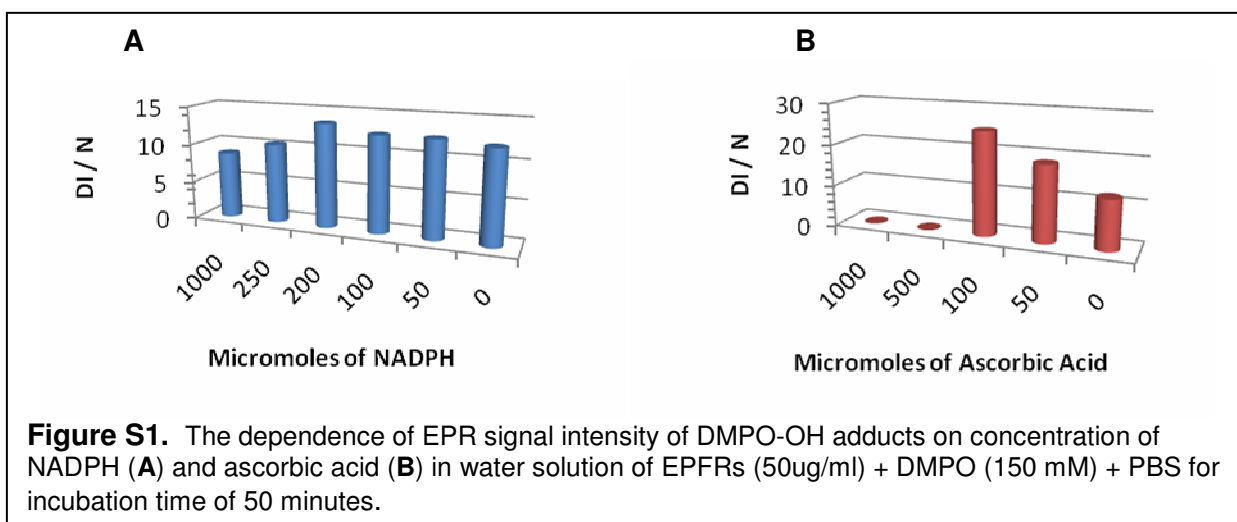

OH adducts may also convert ascorbic acid into ascorbyl radical <sup>4</sup>.

It is interesting that ascorbyl radicals are suddenly generated in a > 500 $\mu$ M solution of ascorbic acid. Ascorbyl radical concentrations were measured in EPFR and non-EPFR solutions containing 1 mM Ascorbic acid (cf. **Figure S2A**), and ascorbyl radicals were immediately observed in both samples. The ascorbyl signal decayed completely during first 120 minutes of incubation in both EPFR (black line) and non-EPFRs (red line) solutions (**Figure S2 A**). DMPO-OH adducts were generated after 120 minutes of incubation time (cf. **Figure S2B**). However, the intensity of DMPO-OH adduct signal is again higher in EPFRs (black line) than non-EPFR (red line) solutions. The presence of ascorbyl radicals in the non-EPFRs solution has been explained as formation of silica – ascorbate complexes, which are oxidized by active surface centers of silica or iron impurities <sup>5</sup>. This explanation is very close to our theory of EPFR formation, and Cu(II) in our system probably oxidizes the ascorbate to ascorbyl radical.

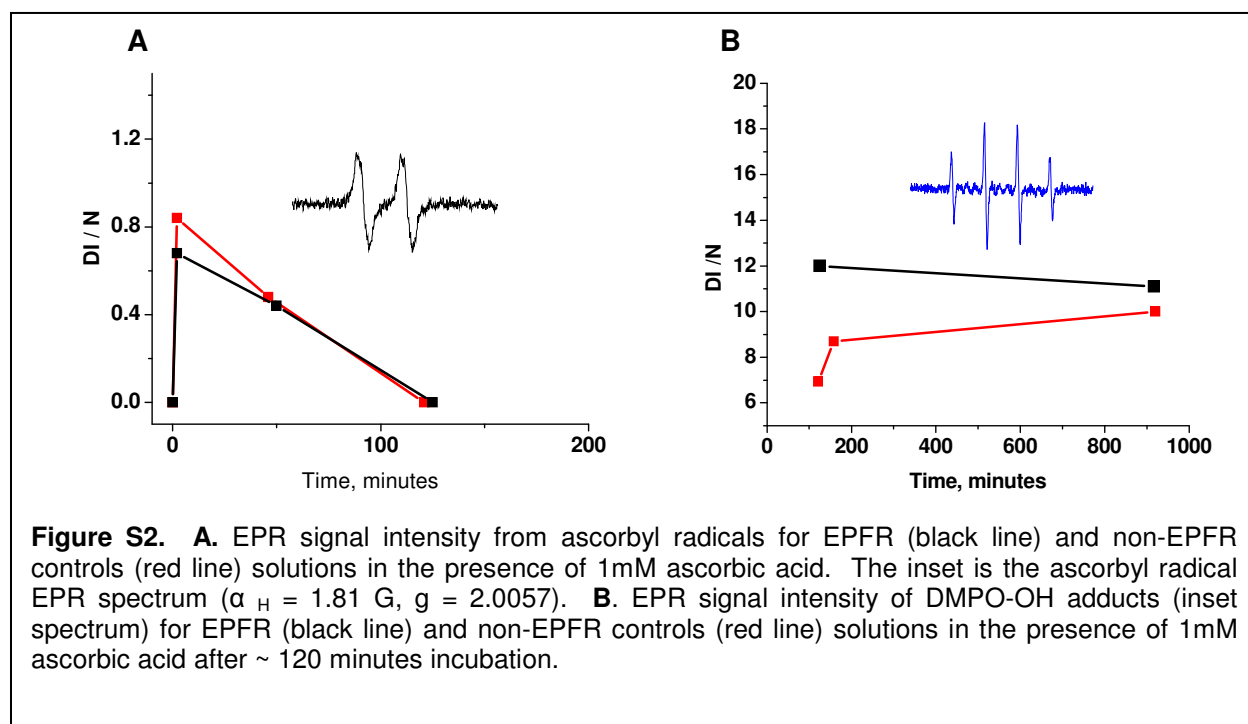

## References

1. Alaghmand, M.; Blough, N. V., Source-dependent variation in hydroxyl radical production by airborne particulate matter. *Environmental Science & Technology* **2007**, *41* (7), 2364-2370.
2. Briede, J. J.; De Kok, T. M. C. M.; Hogervorst, J. G. F.; Moonen, E. J. C.; Den Camp, C. L. B. O.; Kleinjans, J. C. S., Development and application of an electron spin resonance spectrometry method for the determination of oxygen free radical formation by particulate matter. *Environmental Science & Technology* **2005**, *39* (21), 8420-8426.
3. Laroff, G. P.; Fessenden, R. W.; Schuler, R. H., Electron spin resonance spectra of radical intermediates in the oxidation of ascorbic acid and related substances. *J. Am Chem. Soc.* **1972**, *94* (26), 9062-9072.
4. Yordanov, N. D.; Ranguelova, K., Quantitative electron paramagnetic resonance and spectrophotometric determination of the free radical 4-hydroxy-2,2,6,6-tetramethylpiperidinyloxy. *Spectrochimica Acta Part a-Molecular and Biomolecular Spectroscopy* **2000**, *56* (2), 373-378.
5. Fenoglio, I.; Martra, G.; Coluccia, S.; Fubini, B., Possible role of ascorbic acid in the oxidative damage induced by inhaled crystalline silica particles. *Chem. Res. Toxicol.* **2000**, *13* (10), 971-975.
